# Supplementary material for: Synthesis, structure and electrical conductivity of a new perovskite type barium cobaltate BaCoO1.80(OH)0.86
Source: Royal Society of Chemistry journal article supplement (doi:10.1039/c8dt01326h), 2018-01-01
Supplement: c8dt01326h2.pdf [file c8dt01326h2.pdf]

**Electronic Supplementary information for**

Synthesis, structure and electrical conductivity of a new  
perovskite type barium cobaltate  $\text{BaCoO}_{1.80}(\text{OH})_{0.86}$

Aamir Iqbal Waidha<sup>a</sup>, Maren Lepple<sup>b</sup>, Kerstin Wissel<sup>a</sup>, Alexander Benes<sup>c</sup>, Stephan Wollstadt<sup>a</sup>, Peter R. Slater<sup>d</sup>, A.D. Fortes<sup>e</sup>, Oliver Clemens<sup>a,f\*</sup>

<sup>a</sup> Technische Universität Darmstadt, Institut für Materialwissenschaft, Fachgebiet Materialdesign durch Synthese, Alarich-Weiss-Straße 2, 64287 Darmstadt, Germany.

<sup>b</sup> Technische Universität Darmstadt, Eduard-Zintl-Institut für Anorganische und Physikalische Chemie, Alarich-Weiss-Straße 12, 64287 Darmstadt, Germany.

<sup>c</sup> Technische Universität Darmstadt, Institut für Materialwissenschaft, Fachgebiet Gemeinschaftslabor Nanomaterialien, Alarich-Weiss-Straße 2, 64287 Darmstadt, Germany.

<sup>d</sup> University of Birmingham, School of Chemistry, Edgbaston, Birmingham B15 2TT, UK

<sup>e</sup> ISIS Facility, Rutherford Appleton Laboratory, Harwell Science and Innovation Campus, Didcot, Oxfordshire OX11 0QX, United Kingdom

<sup>f</sup> Karlsruher Institut für Technologie, Institut für Nanotechnologie, Hermann-von-Helmholtz-Platz 1, 76344 Eggenstein Leopoldshafen, Germany.

\* Corresponding Author:

Fax: +49 6151 16 21991

E-Mail: [oliver.clemens@md.tu-darmstadt.de](mailto:oliver.clemens@md.tu-darmstadt.de)

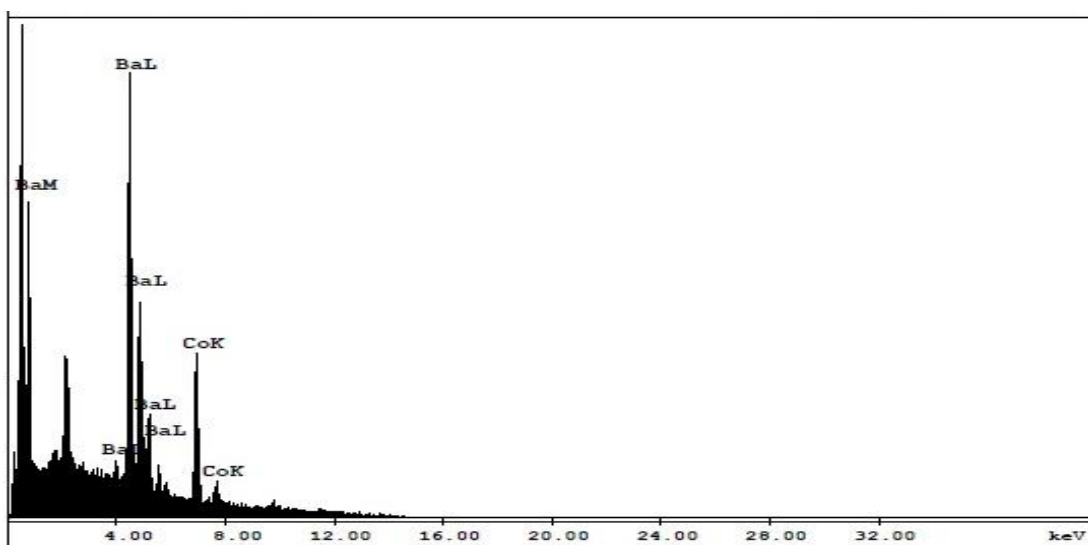

Figure S1:- EDAX for the as-synthesized  $\text{BaCoO}_{1.80}(\text{OH})_{0.86}$  powder.

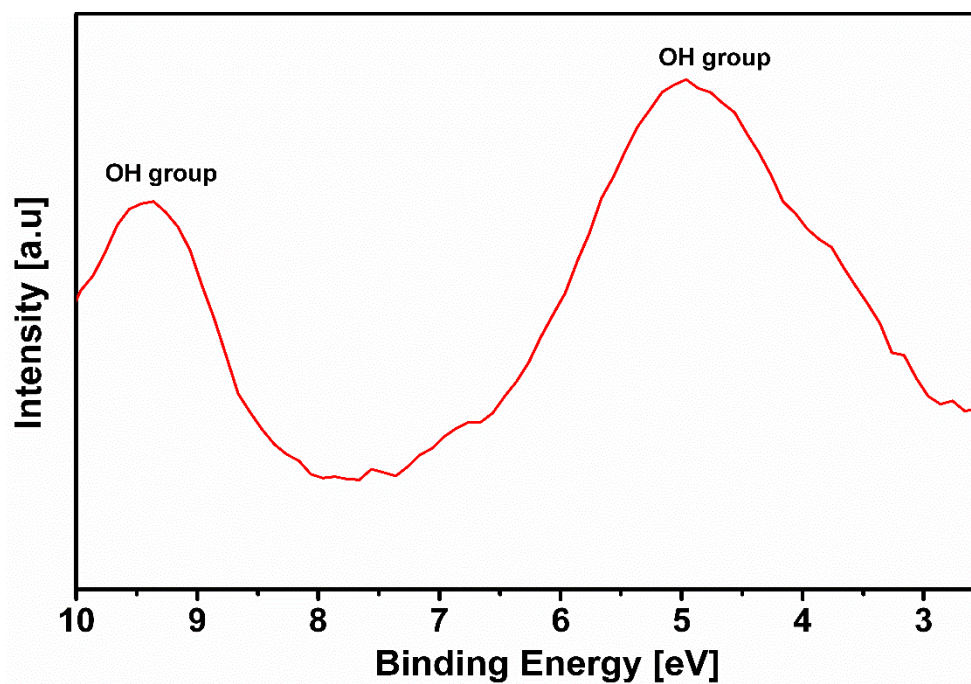

Figure S2:- XPS of the valence band for  $\text{BaCoO}_{1.80}(\text{OH})_{0.86}$  powder.
